# Supplementary material
Source: Springer Nature journal article supplement (https://www.springermedizin.de/resource/supplementary/12943_2011_1009_MOESM4_ESM.pdf/9552100)

**A** IgG Control

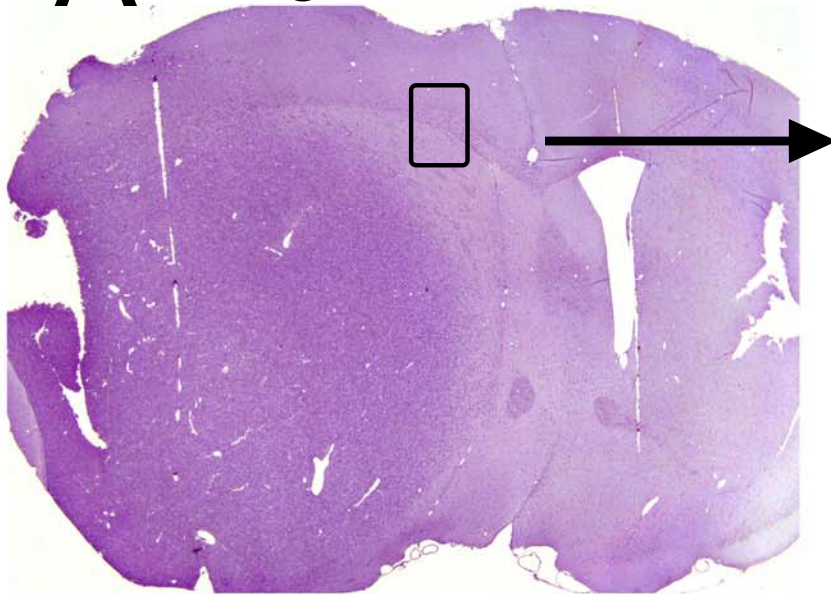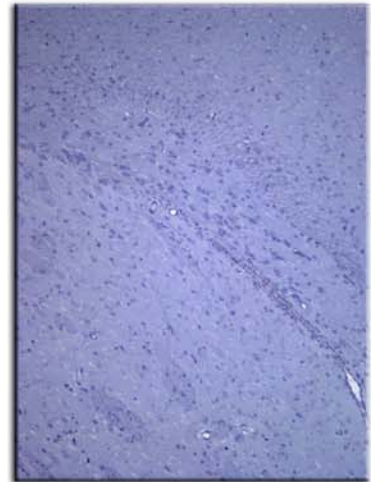

**B** Anti-Gal1

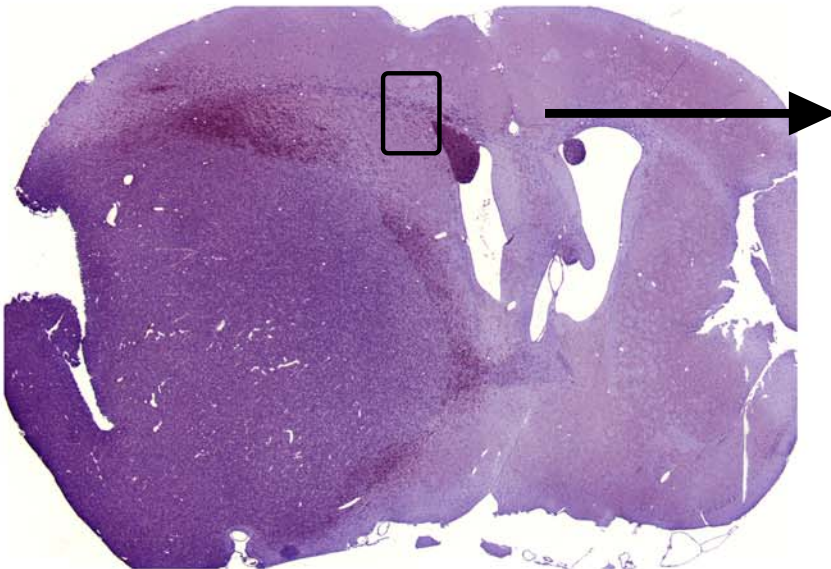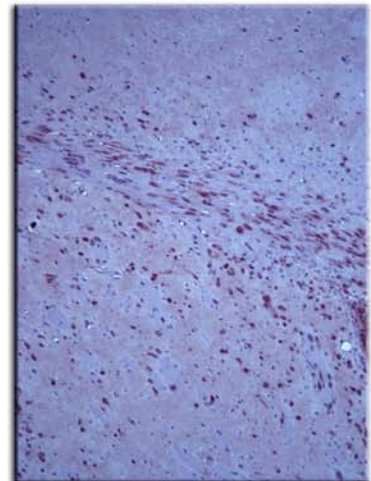

**C** Anti-human

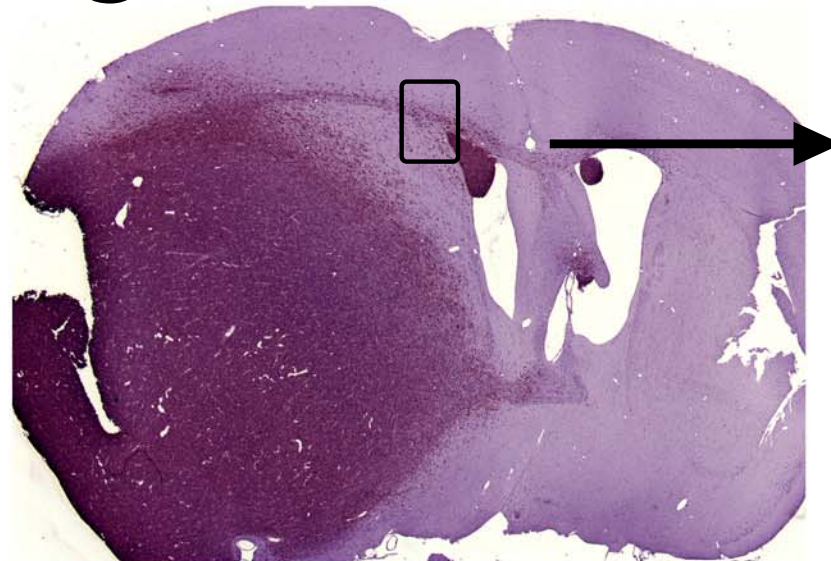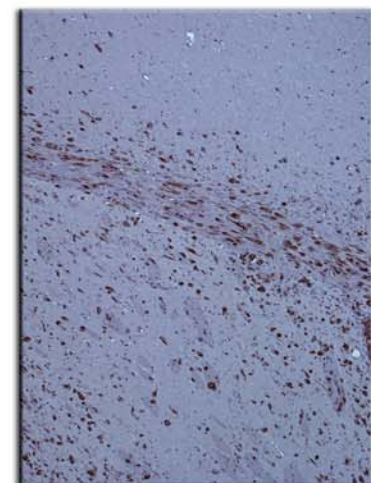

Supplement: MOESM4 [file 9552100]
